# Supplementary material for: INO80 Is Required for the Cell Cycle Control, Survival, and Differentiation of Mouse ESCs by Transcriptional Regulation
Source: MDPI journal article supplement (doi:10.3390/ijms232315402), 2022-12-06
Supplement: s1 [file s1]

Cell cycle analysis in ESC (related to Figure 1G)

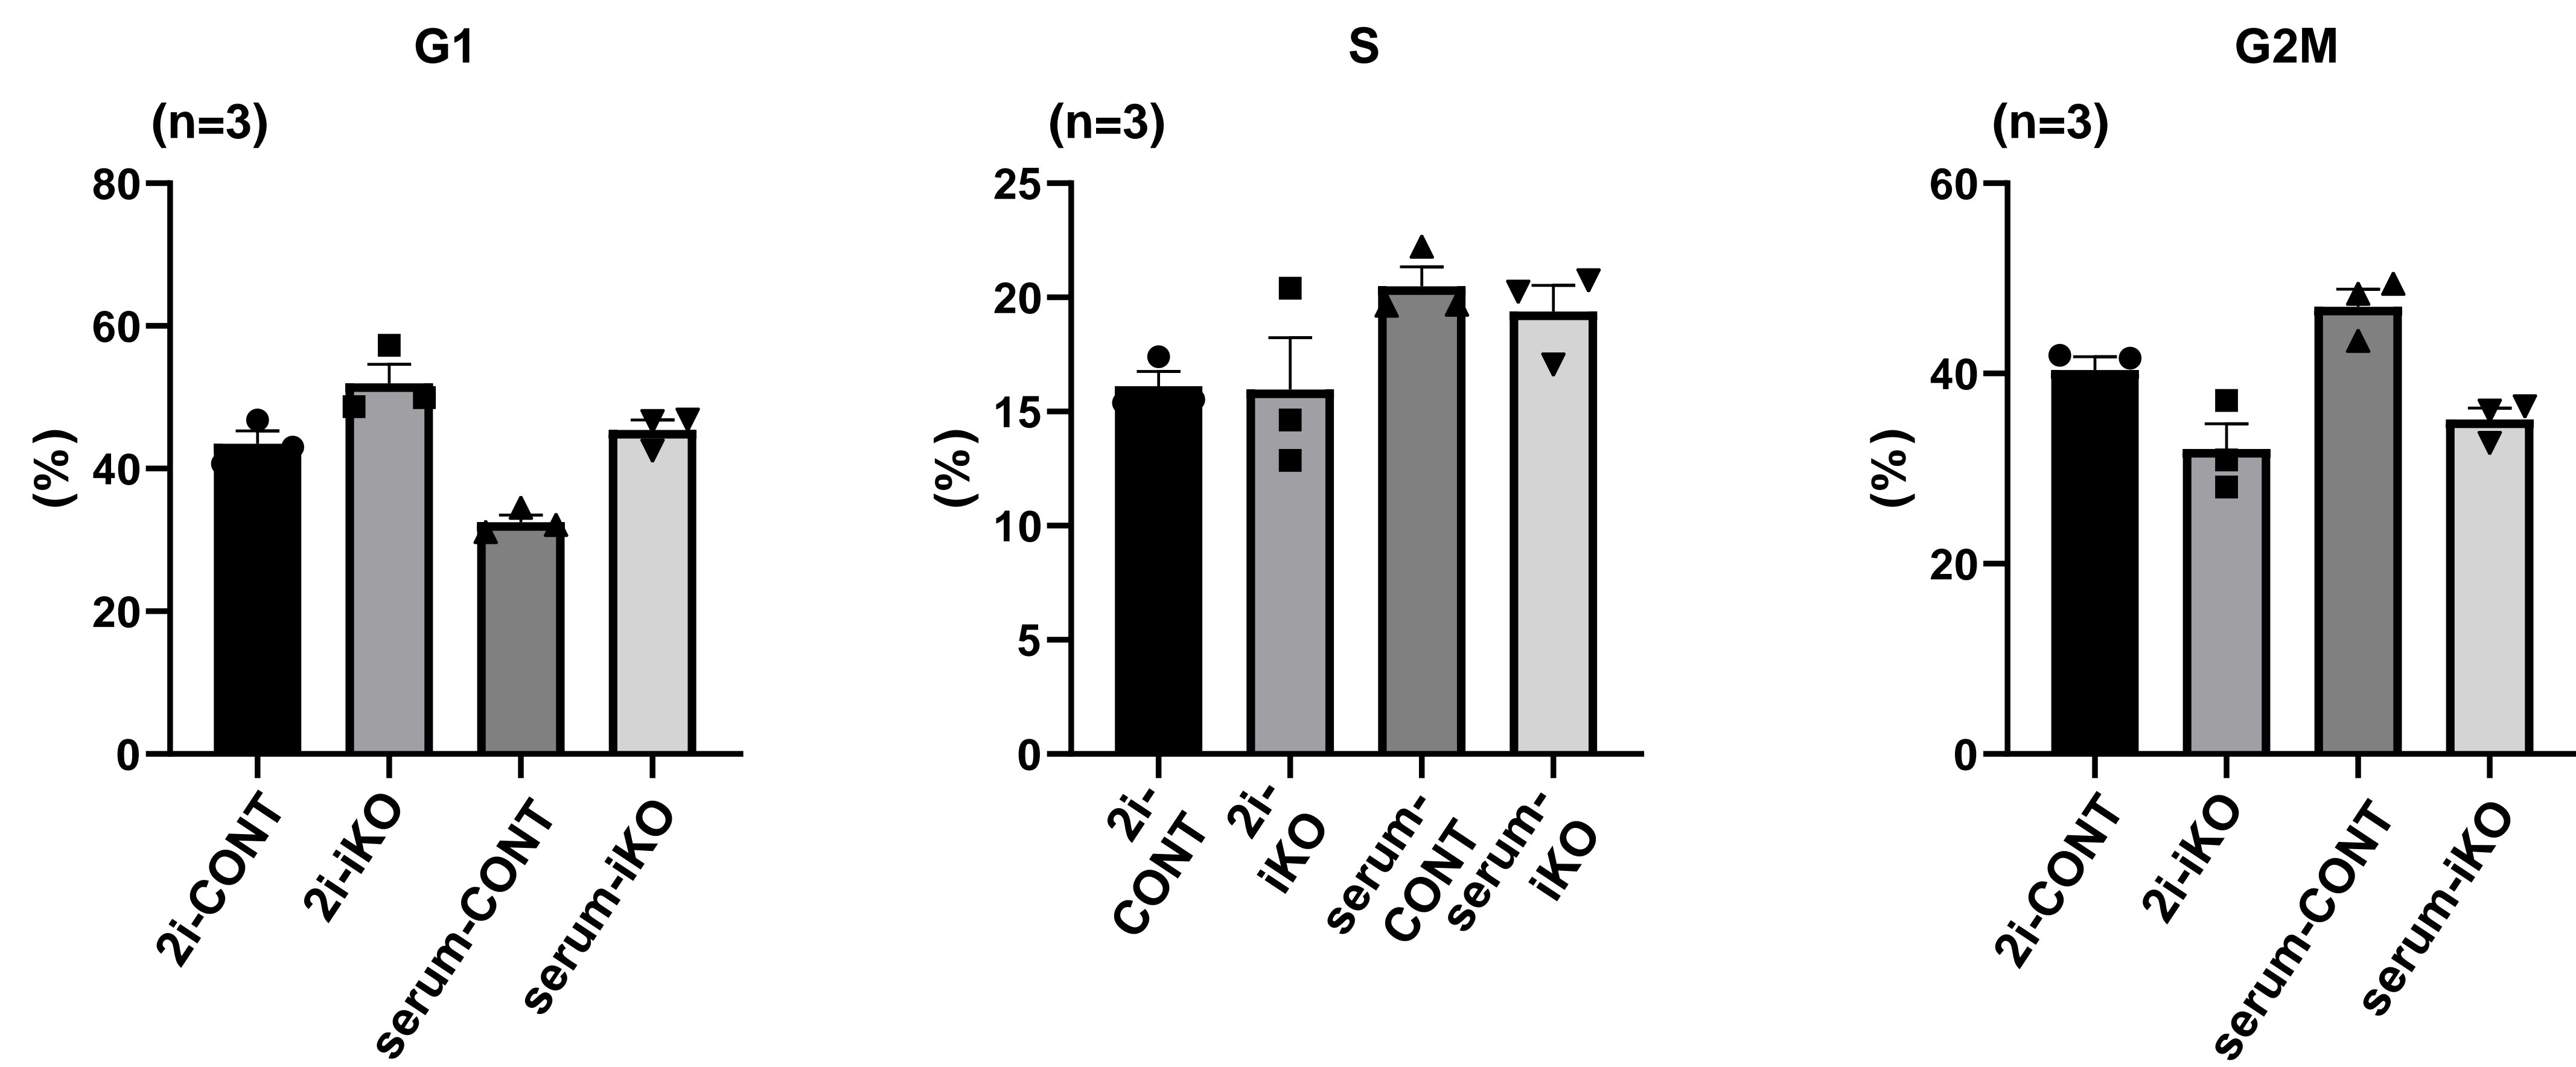

Figure S1. Cell cycle analysis in ESC.

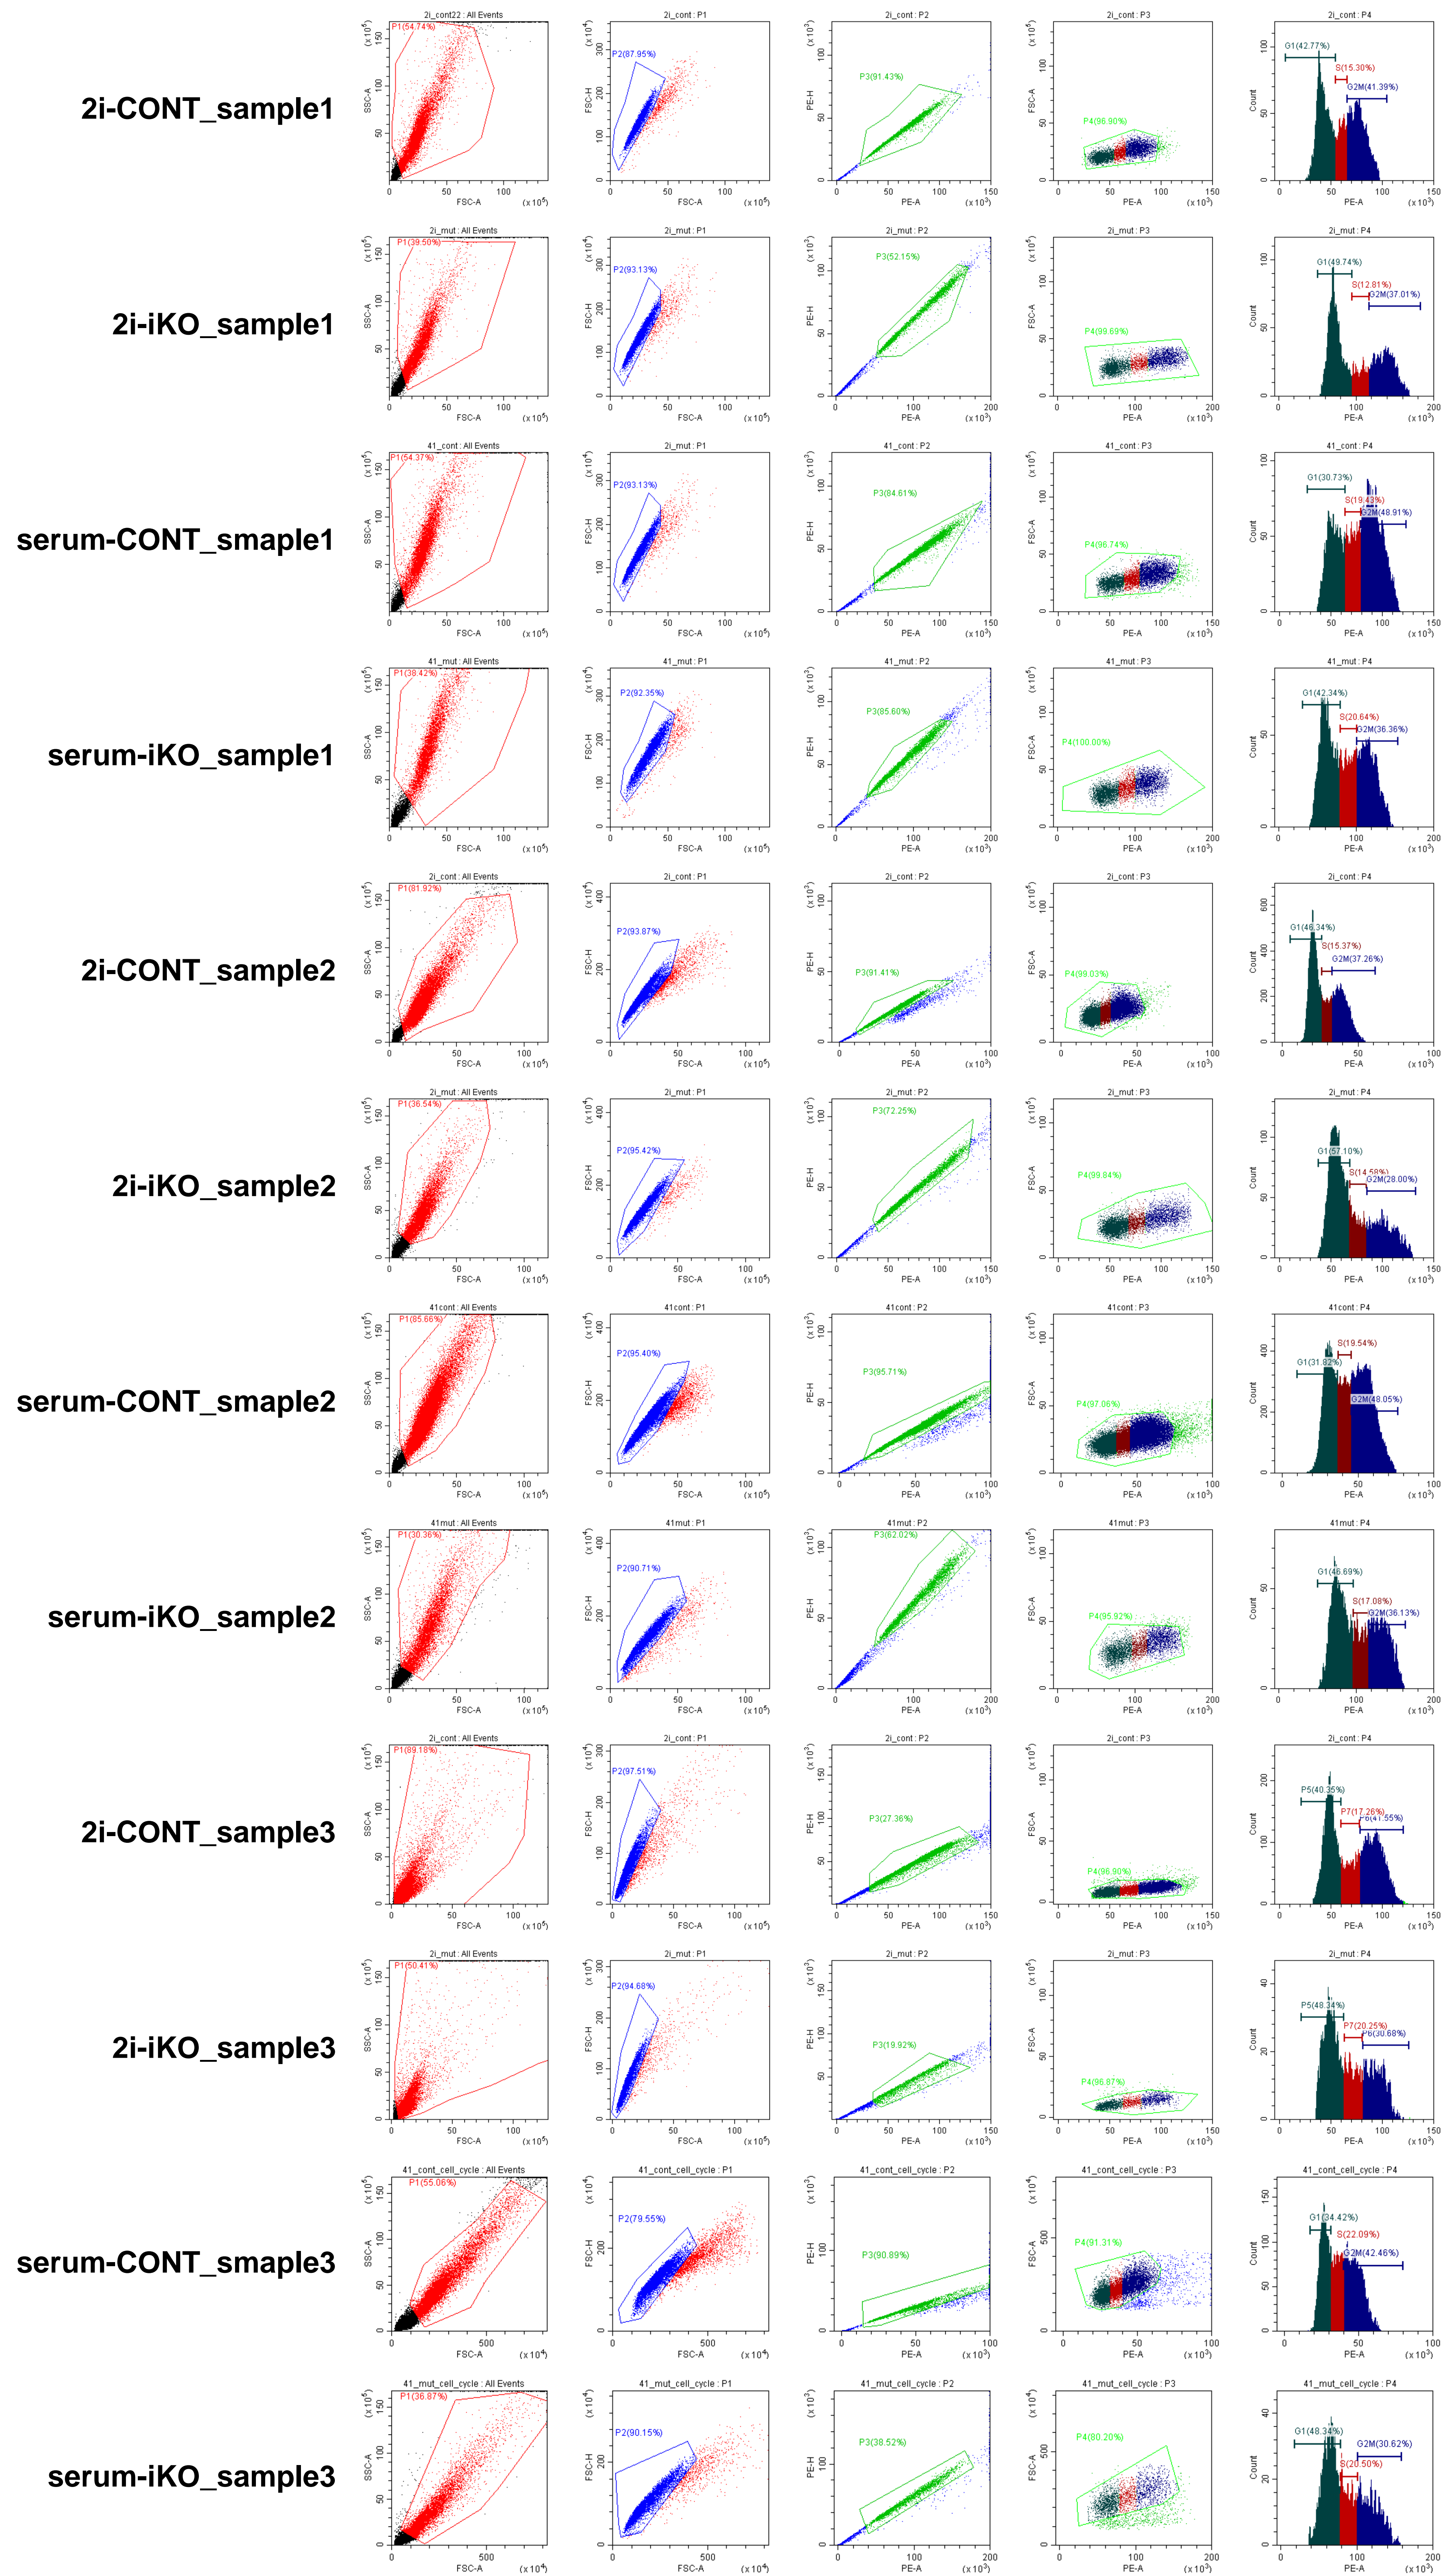

Figure S2. Panels of flow cytometric analysis of ESC.



Cell cycle analysis in differentiating ESC (related to Figure 3C)

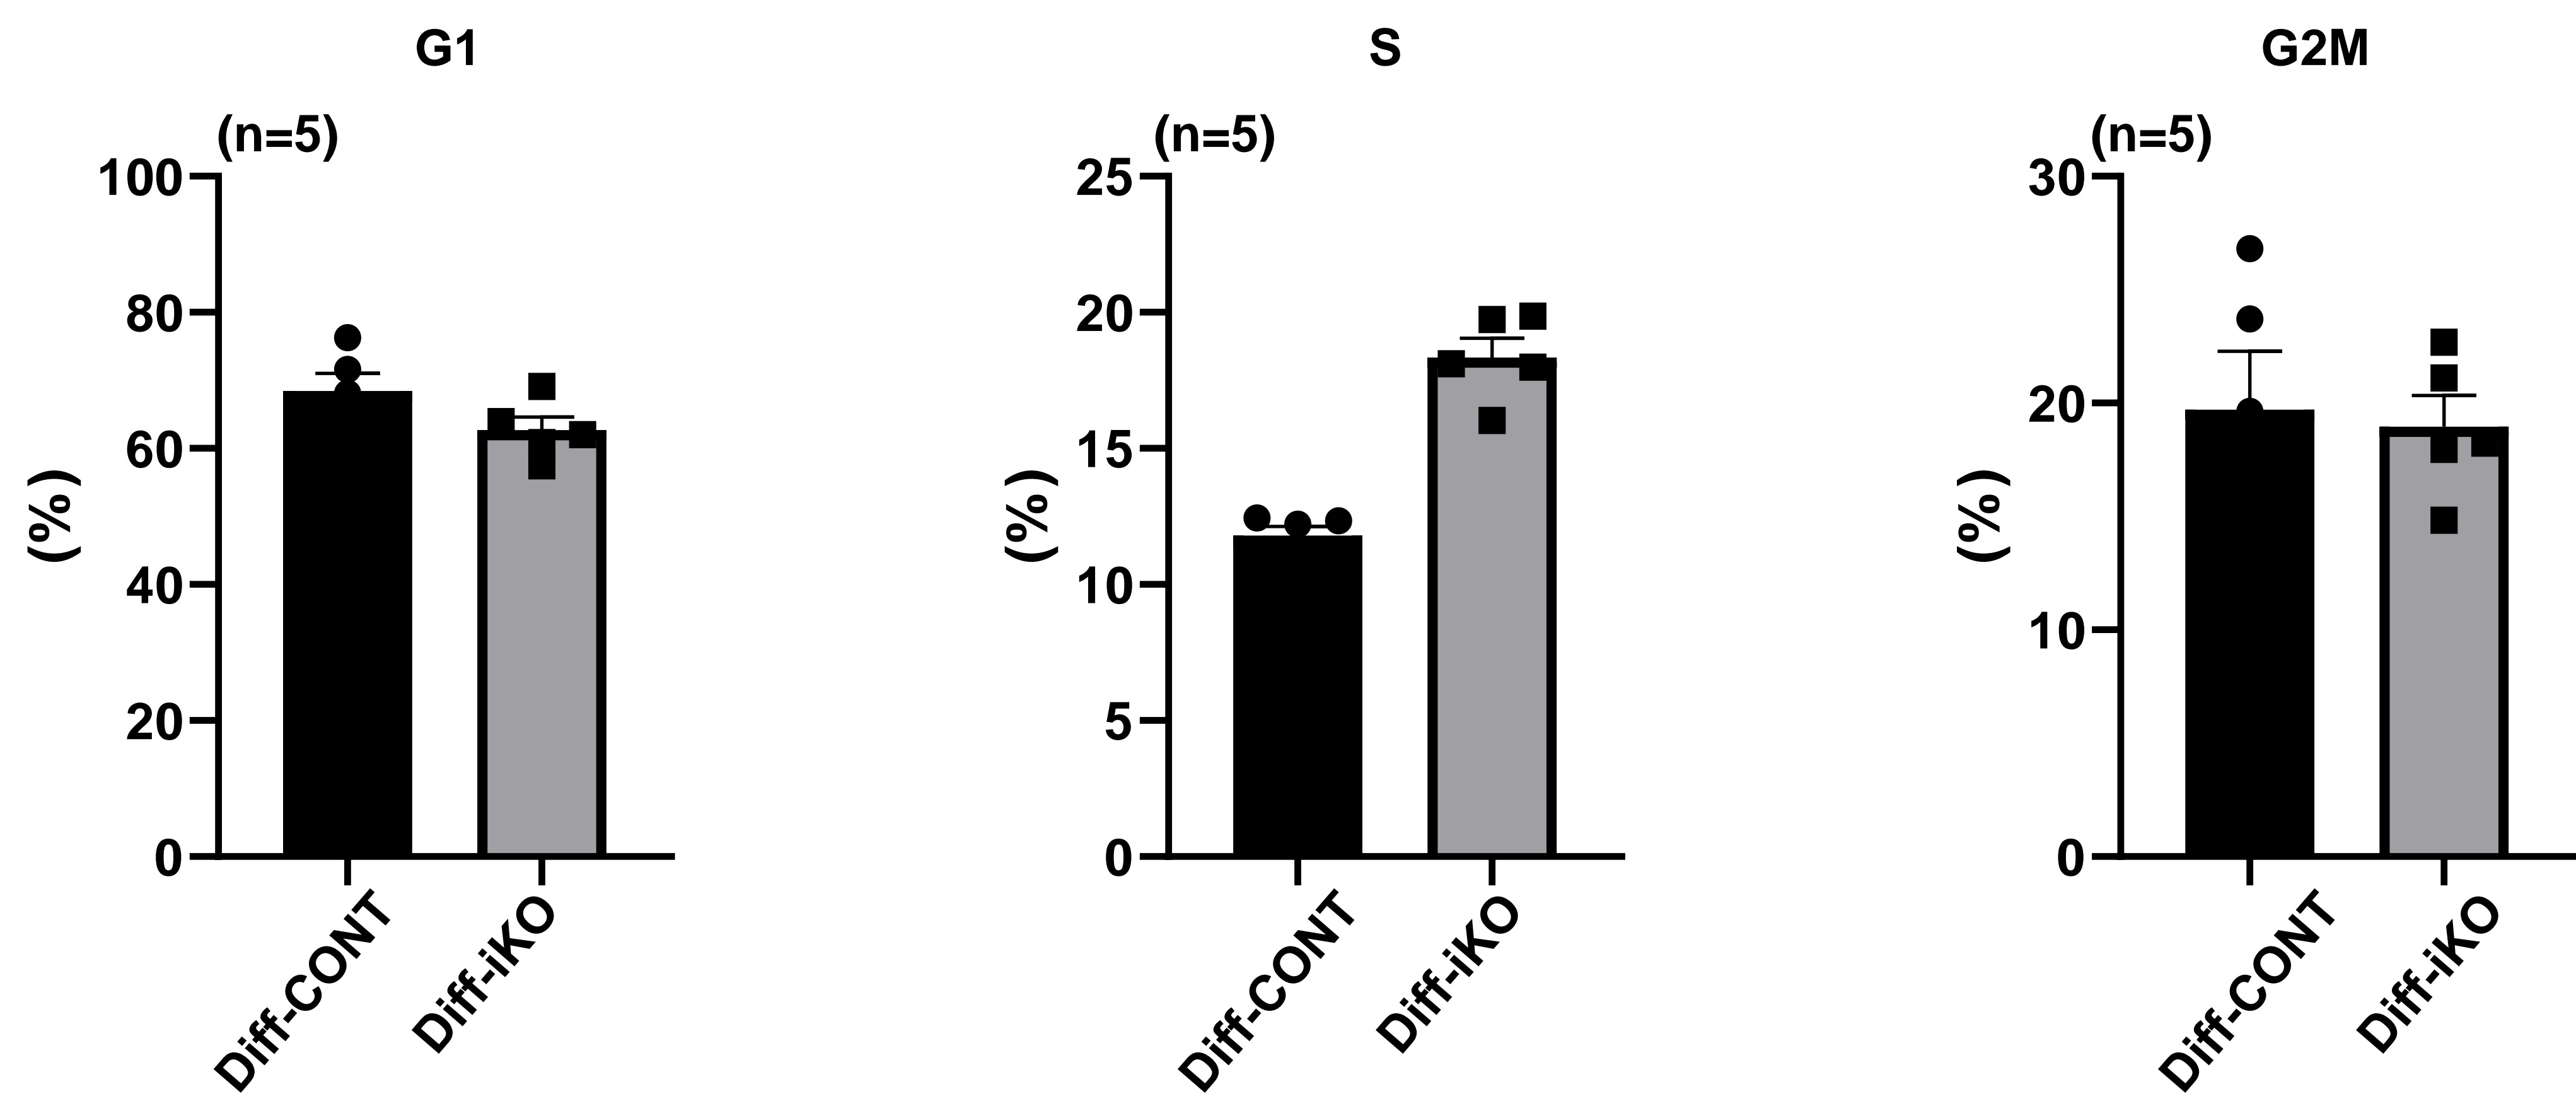

Figure S3. Cell cycle analysis in differentiating ESC.

Diff-CONT\_sample1

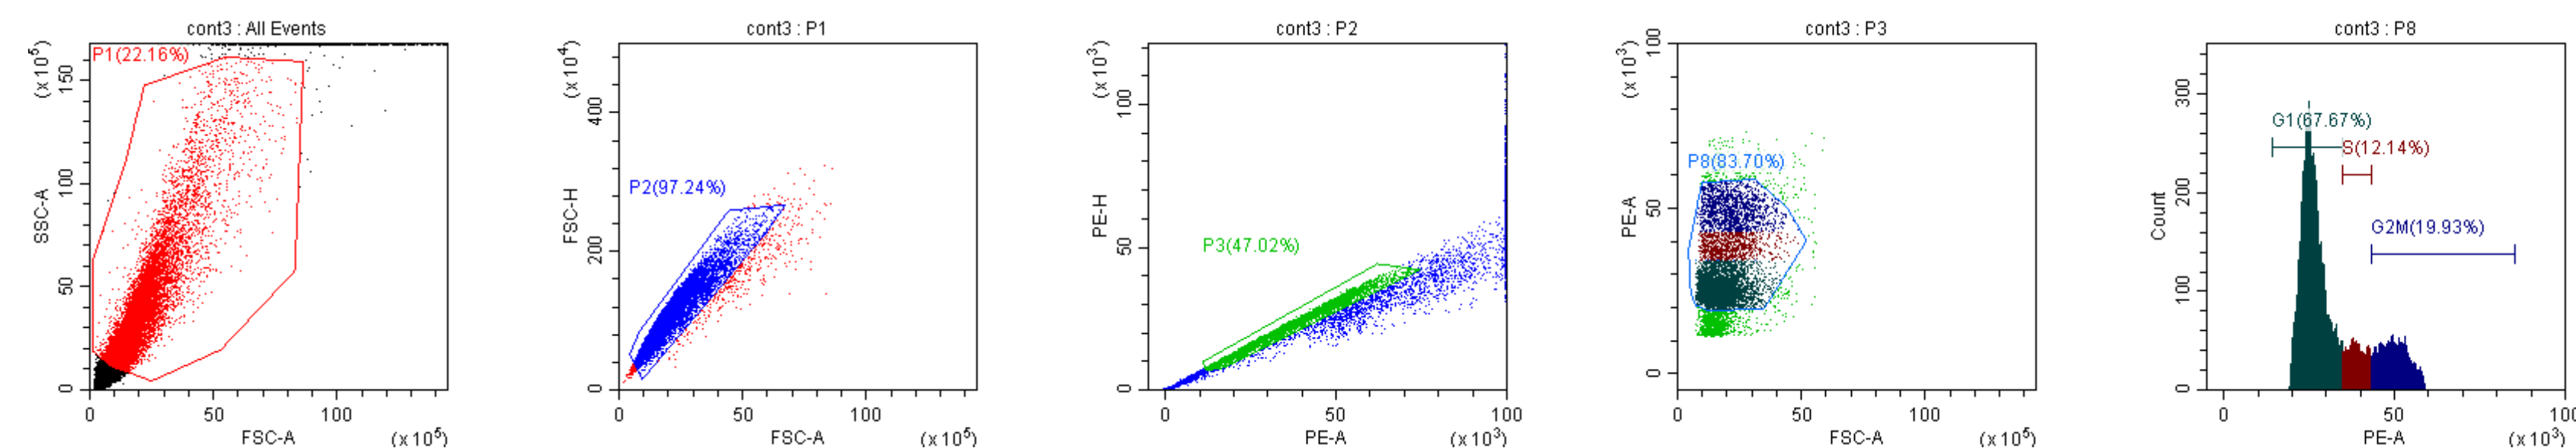

Diff-iKO\_sample1

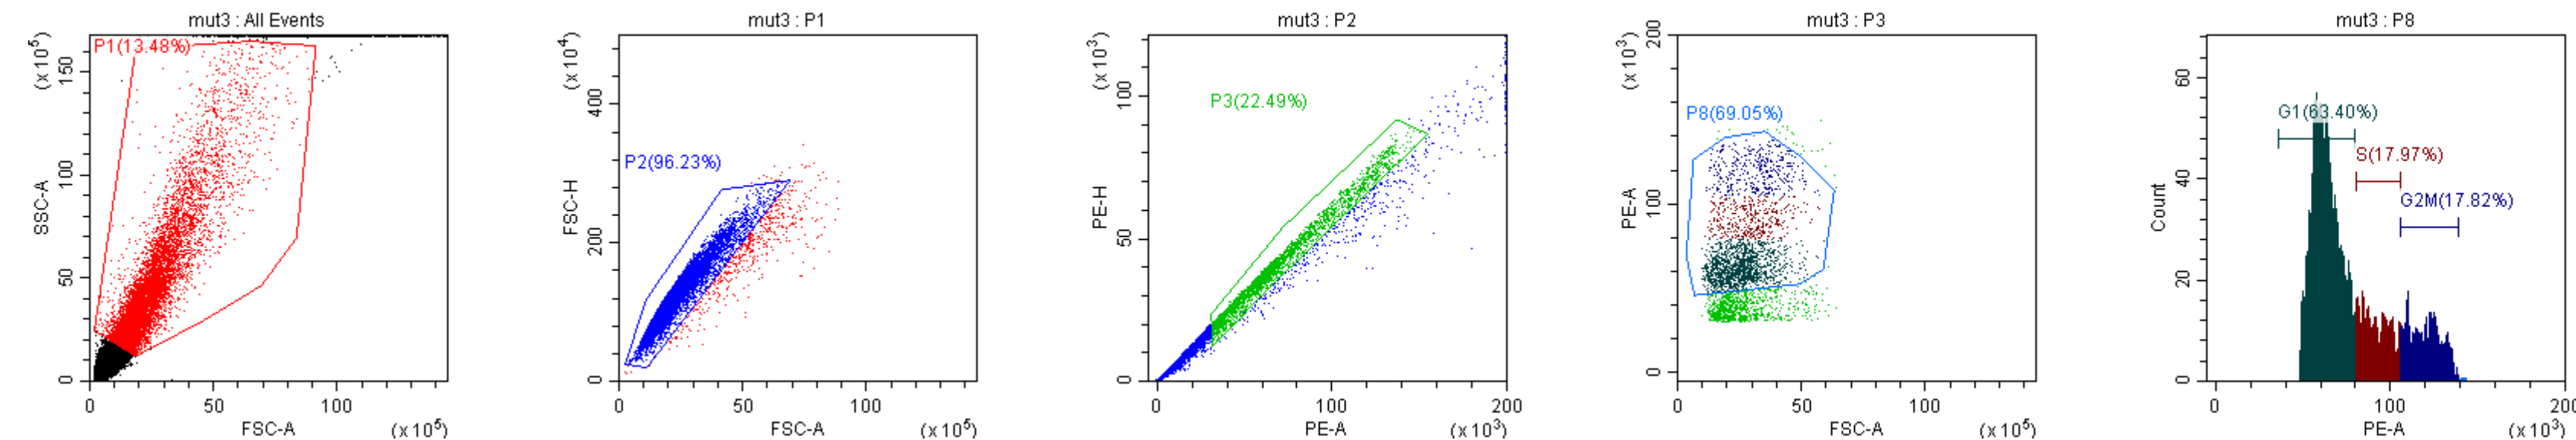

Diff-CONT\_sample2

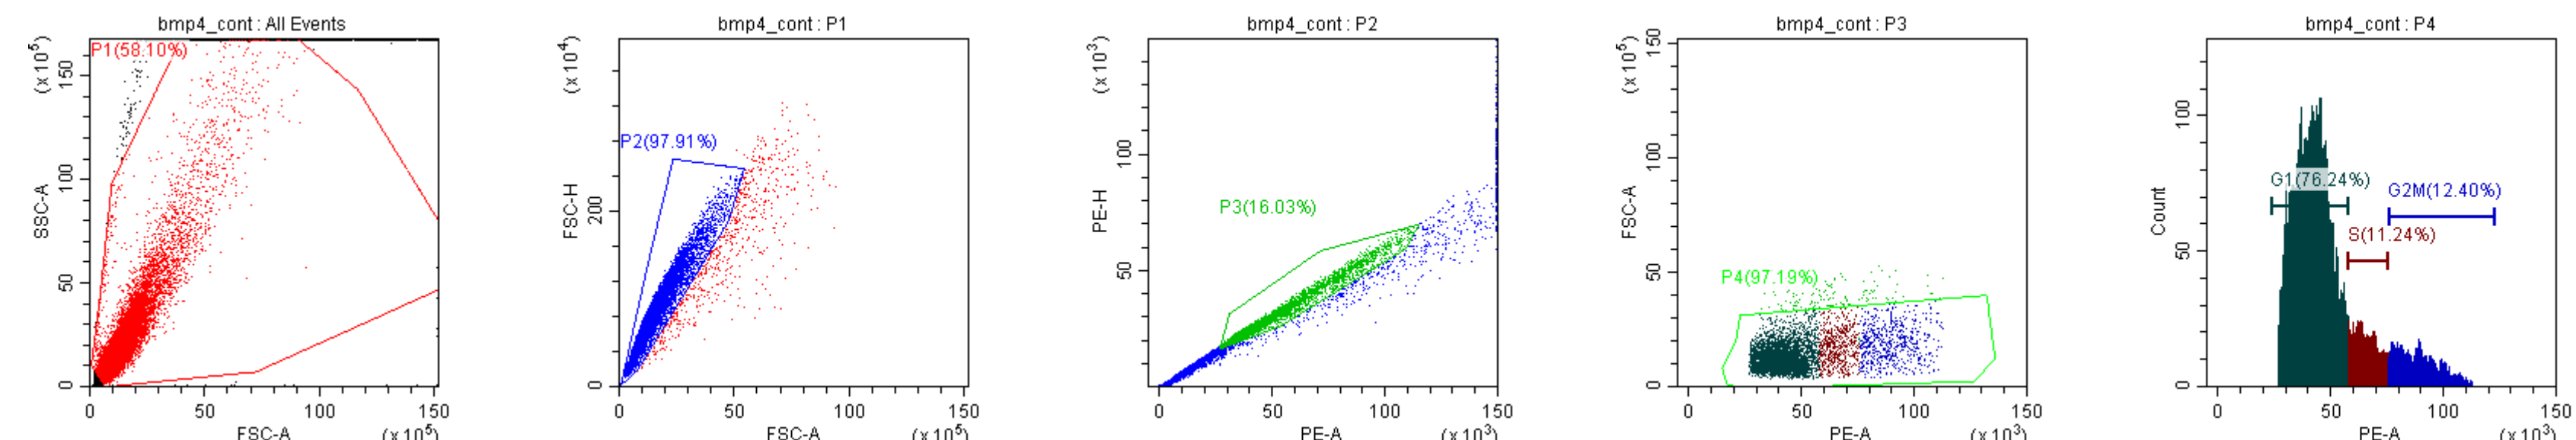

Diff-iKO\_sample2

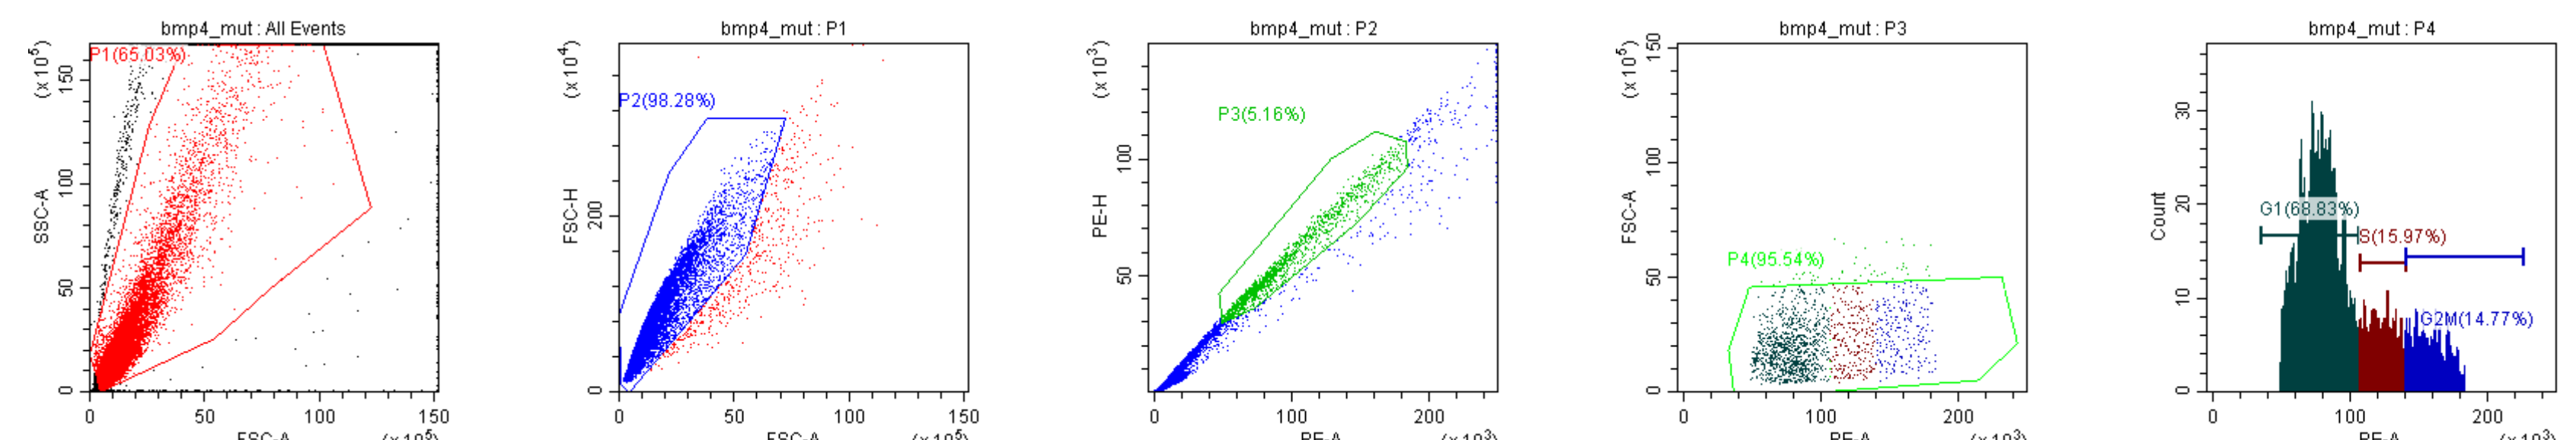

Diff-CONT\_sample3

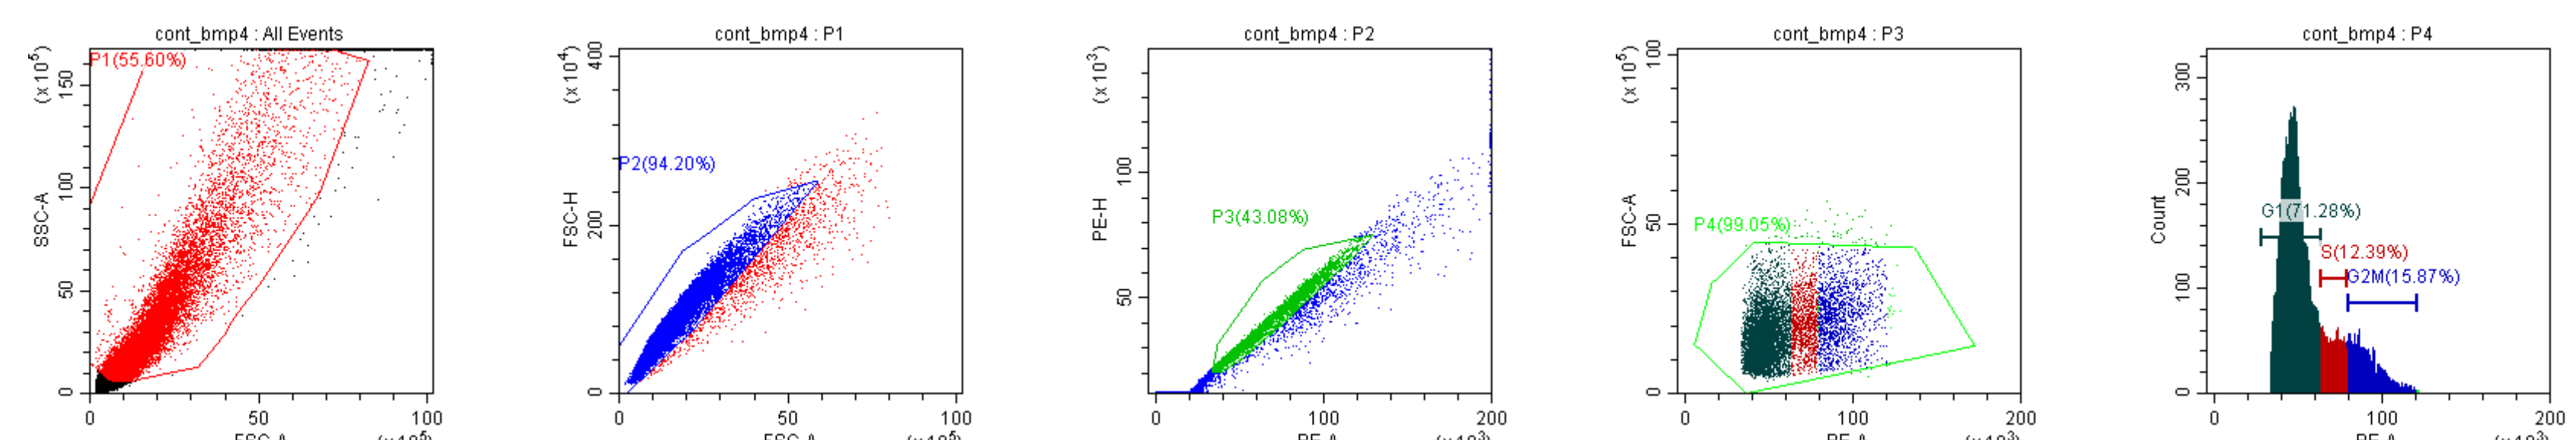

Diff-iKO\_sample3

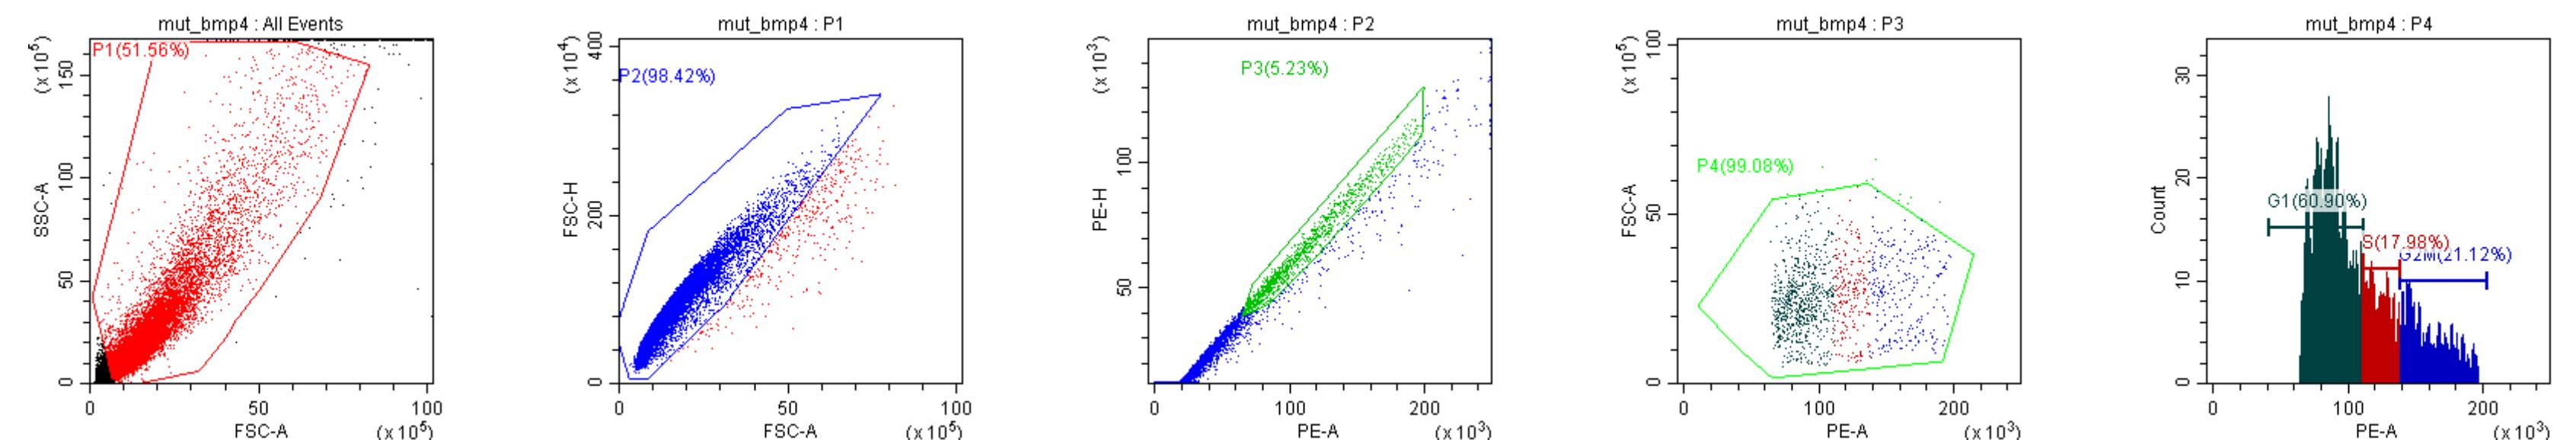

Diff-CONT\_sample4

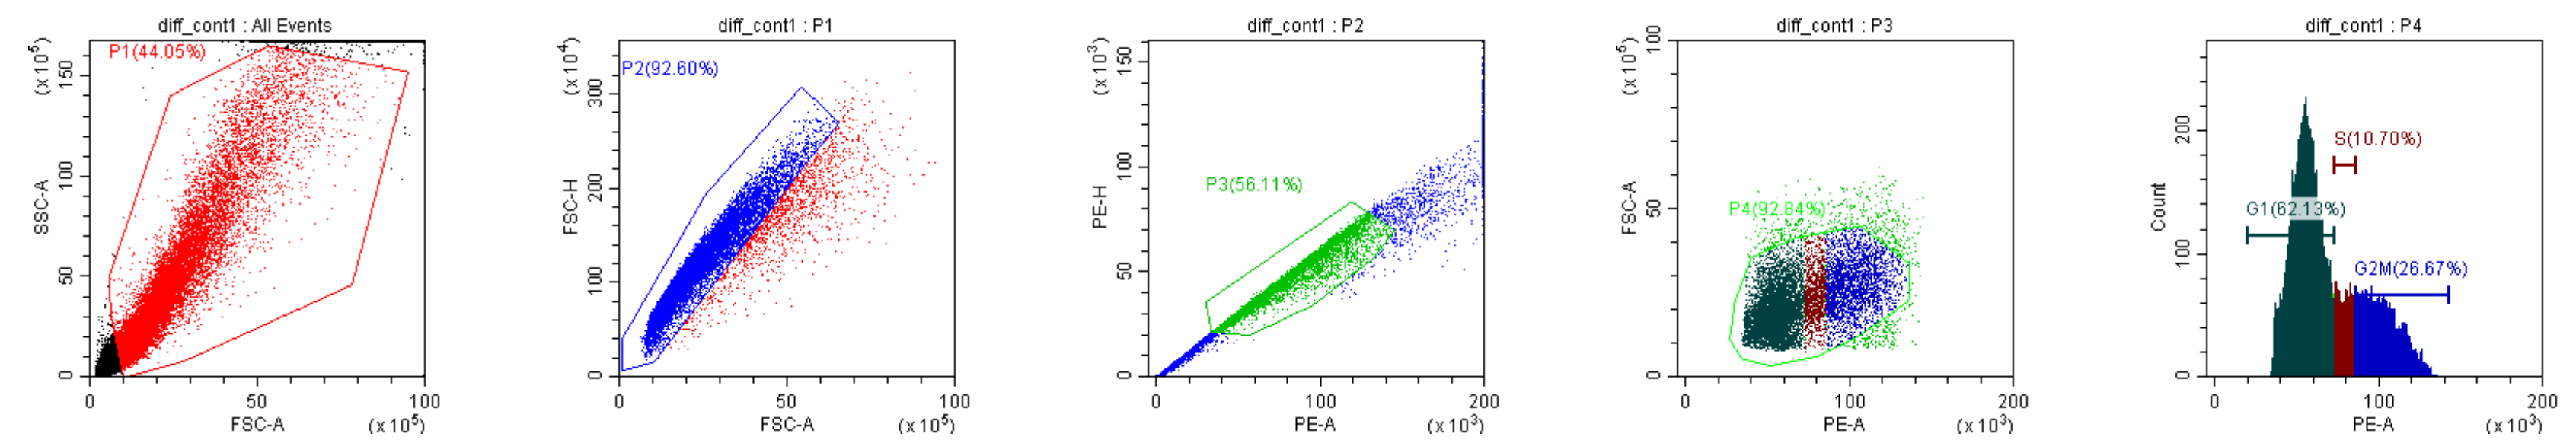

Diff-iKO\_sample4

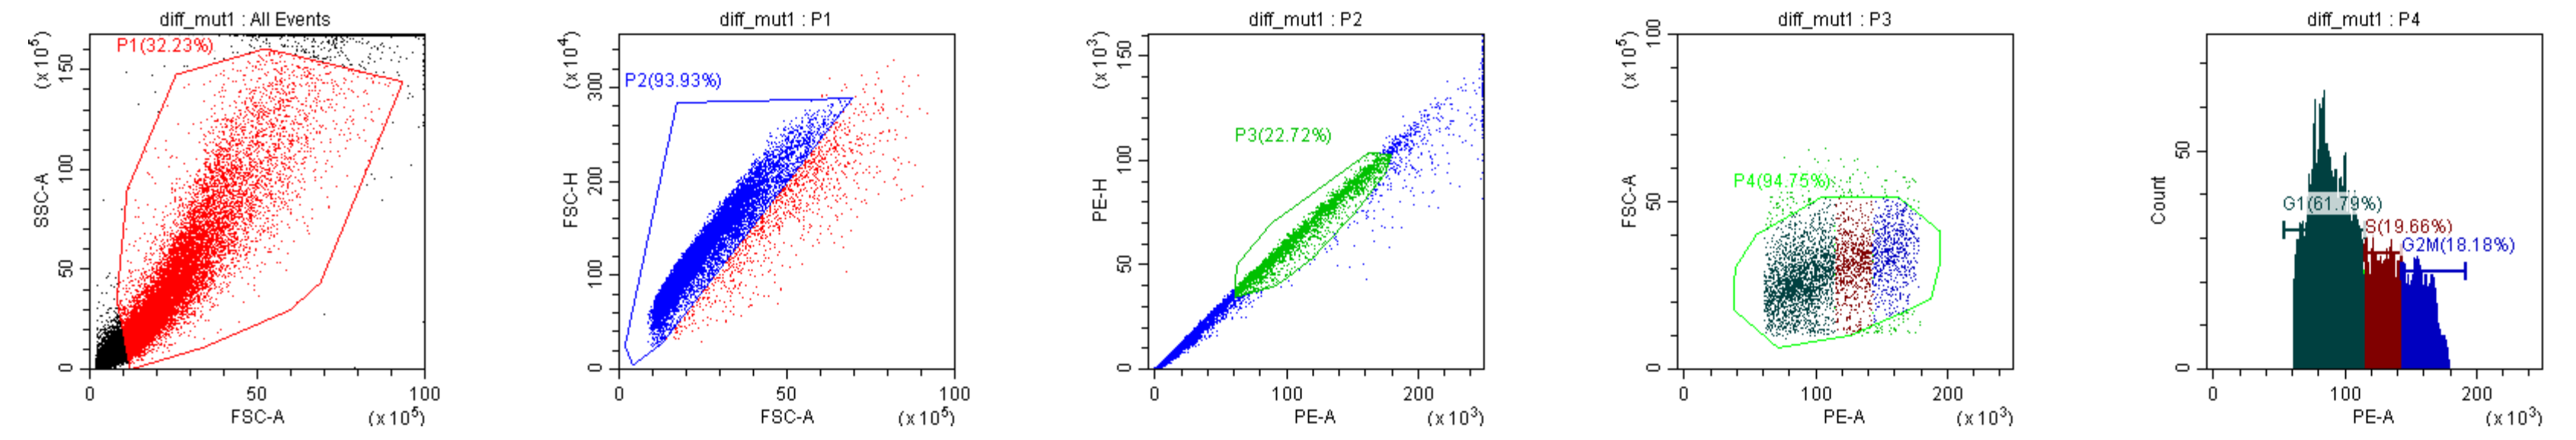

Diff-CONT\_sample5

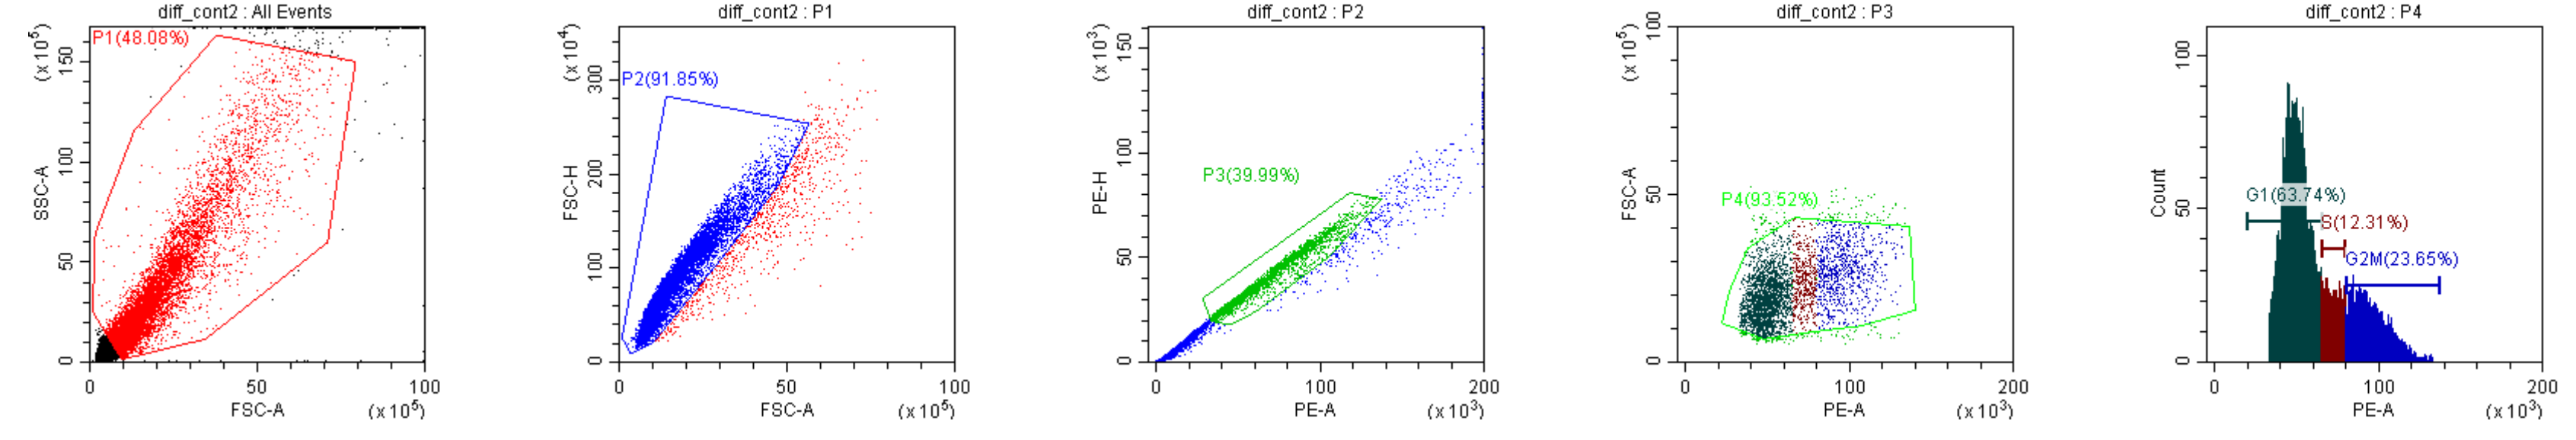

Diff-iKO\_sample5

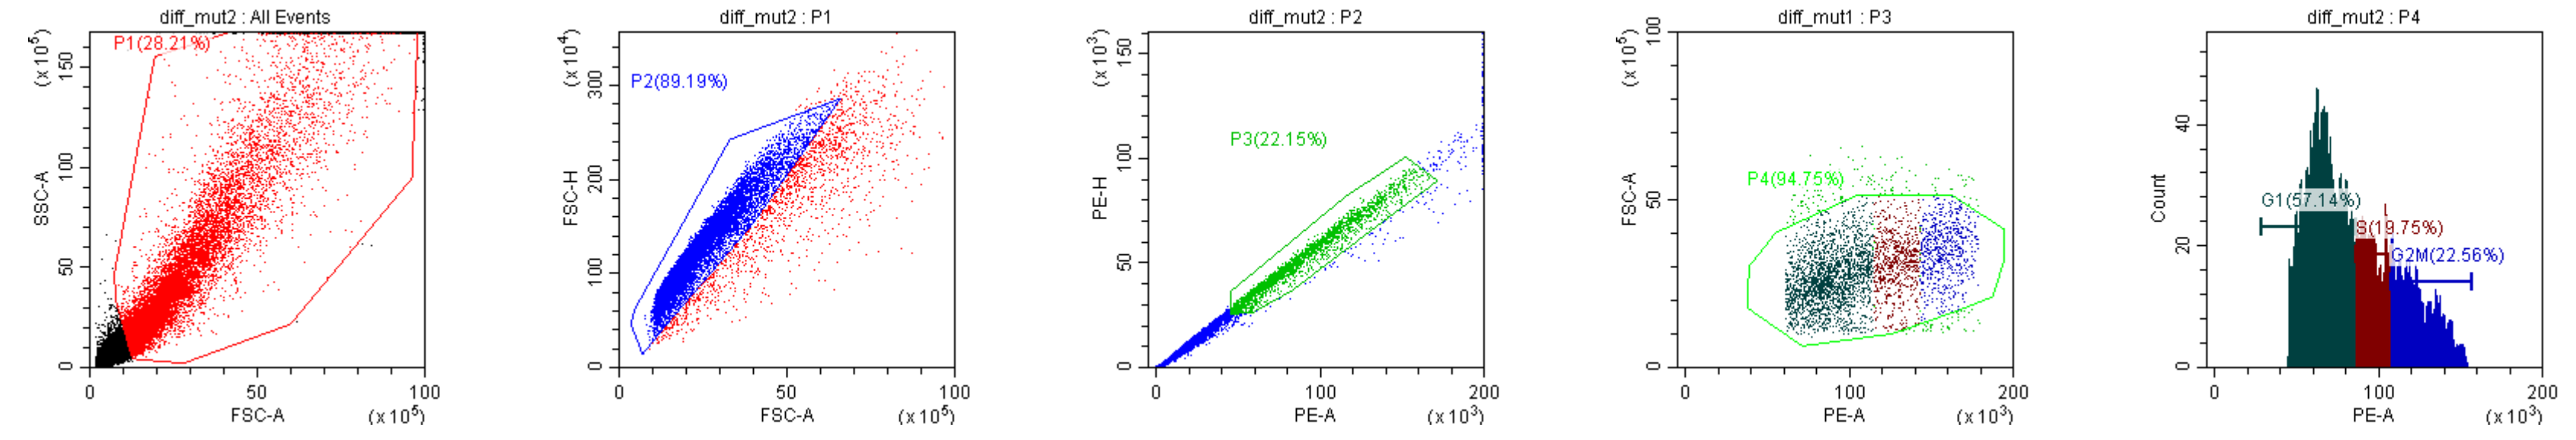

Figure S4. Panels of flow cytometric analysis of differentiating ESC.
